# Supplementary material for: Microvesicles Derived from Human Umbilical Cord Mesenchymal Stem Cells Enhance Alveolar Type II Cell Proliferation and Attenuate Lung Inflammation in a Rat Model of Bronchopulmonary Dysplasia
Source: Hindawi journal article supplement (doi:10.1155/2022/8465294), 2022-06-27

# Figure S1

A

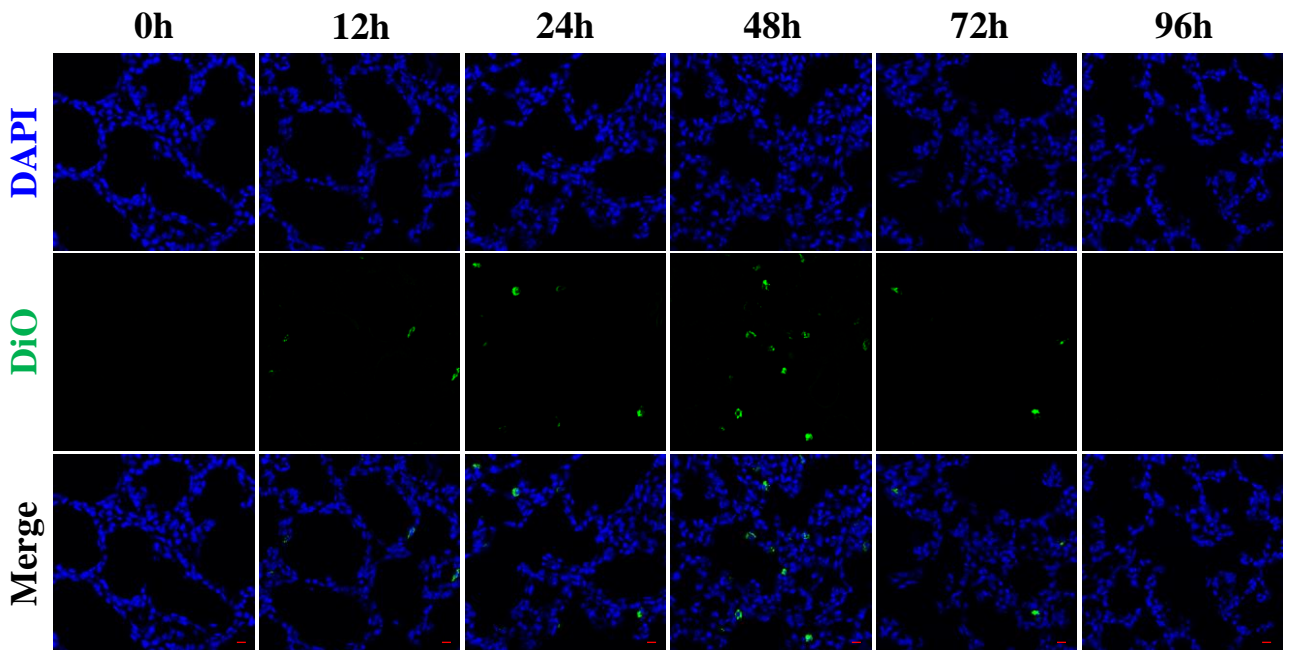

B

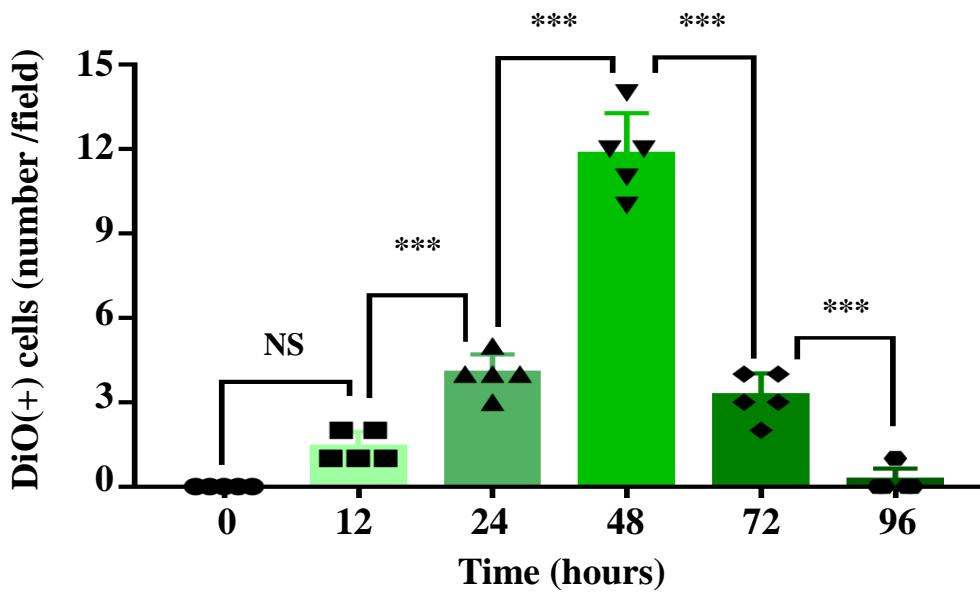

# Figure S2

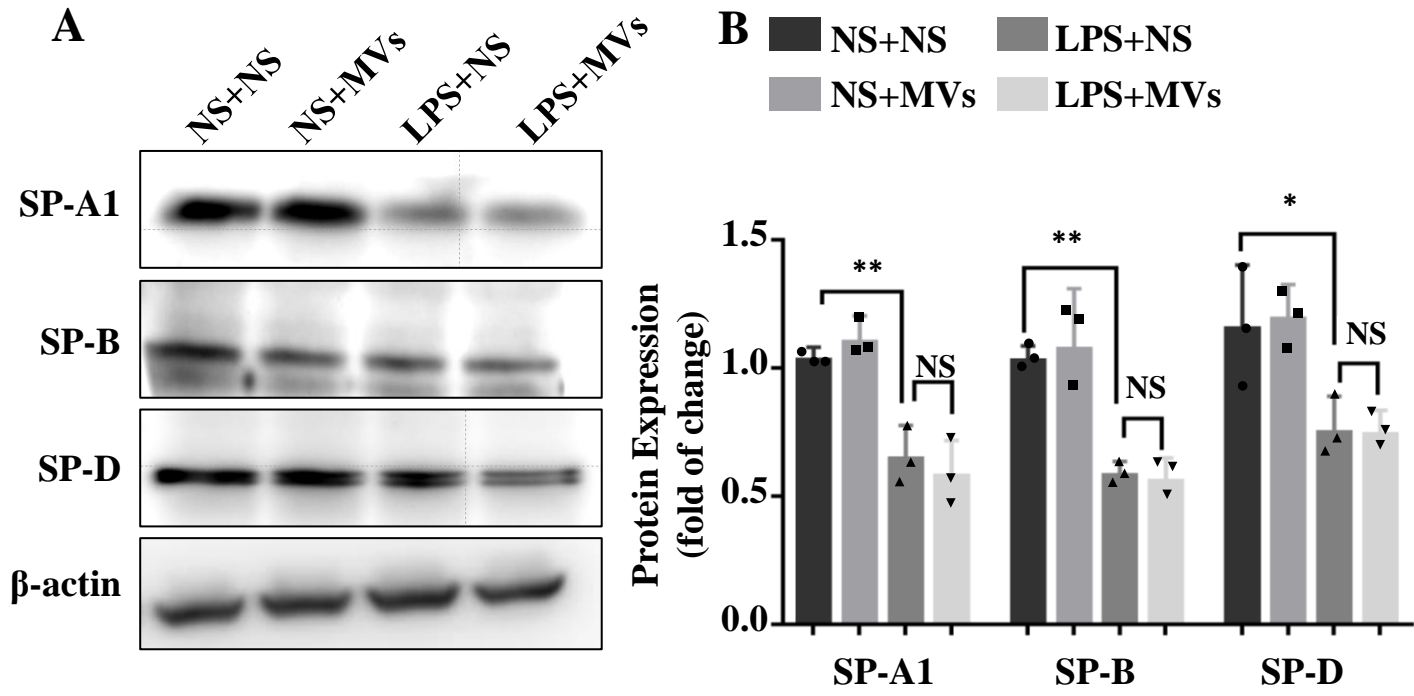

# Figure S3

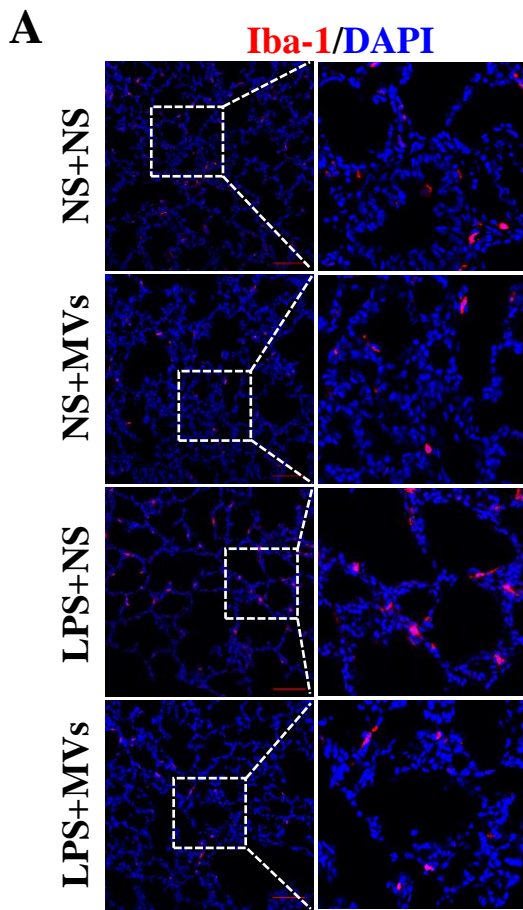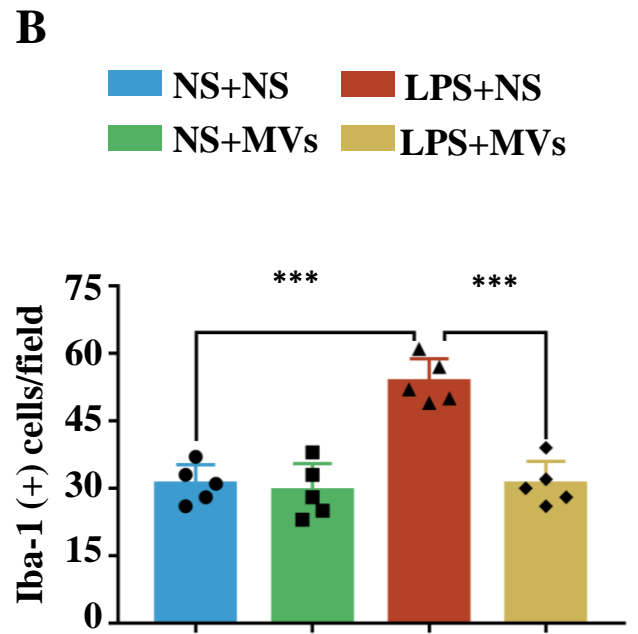

Supplement: f1 [file 8465294.f1.pdf]
